# Supplementary material
Source: PubMed Central journal article supplement (PMC6348074)
Supplement: NIHMS981320-supplement-Supplement.pdf [file NIHMS981320-supplement-Supplement.pdf]

All searches before duplicates removed: 1276

All searches after duplicates removed: 735

#### PubMed Search 1/8/2018

| Search | Query                                                                                                                                                                                                               | Items Found |
|--------|---------------------------------------------------------------------------------------------------------------------------------------------------------------------------------------------------------------------|-------------|
| #1     | (Microbiota[tw] OR Microbiotas[tw] OR Microbiome[tw] OR Microbiomes[tw] OR microflora[tw] OR flora[tw] OR bacteria[tw] OR probiotic[tw] OR microorganism[tw])                                                       | 489420      |
| #2     | (Depression[tw] OR mood[tw] OR moods[tw] OR anxiety[tw] OR anxieties[tw] OR depressions[tw] OR dysthymic[tw] OR dysthymia[tw] OR dysphoric[tw] OR affective[tw] OR depressive[tw] OR cyclothymic[tw] OR stress[tw]) | 1266132     |
| #3     | (Perinatal[tw] OR postnatal[tw] OR postpartum[tw] OR puerperium[tw] OR peripartum[tw] OR pregnancy[tw] OR pregnant[tw] OR antenatal[tw] OR antepartum[tw])                                                          | 1004853     |
| #4     | #1 AND #2 AND #3                                                                                                                                                                                                    | 219         |

PubMed before duplicates removed: 219

PubMed after duplicates removed: 214

#### Scopus Search 1/8/2018

| Search | Query                                                                                                                                                                           | Items Found |
|--------|---------------------------------------------------------------------------------------------------------------------------------------------------------------------------------|-------------|
| #1     | TITLE-ABS-KEY ( microbiota OR microbiotas OR microbiome OR microbiomes OR microflora OR flora OR bacteria OR probiotic OR microorganism )                                       | 1,376,652   |
| #2     | TITLE-ABS-KEY ( depression OR mood OR moods OR anxiety OR anxieties OR depressions OR dysthymic OR dysthymia OR dysphoric OR affective OR depressive OR cyclothymic OR stress ) | 2,962,176   |
| #3     | TITLE-ABS-KEY ( perinatal OR postnatal OR postpartum OR puerperium OR peripartum OR pregnancy OR pregnant OR antenatal OR antepartum )                                          | 1,177,149   |
| #4     | #1 AND #2 AND #3                                                                                                                                                                | 591         |

Scopus before duplicates removed: 591

Scopus after duplicates removed: 389

#### Embase Search 1/8/2018

| Search | Query                                                                                                                                                                                                                                                                              | Items Found |
|--------|------------------------------------------------------------------------------------------------------------------------------------------------------------------------------------------------------------------------------------------------------------------------------------|-------------|
| #1     | perinatal:ab,ti,de OR postnatal:ab,ti,de OR postpartum:ab,ti,de OR puerperium:ab,ti,de OR peripartum:ab,ti,de OR pregnancy:ab,ti,de OR pregnant:ab,ti,de OR antenatal:ab,ti,de OR antepartum:ab,ti,de                                                                              | 1,086,700   |
| #2     | depression:ab,ti,de OR mood:ab,ti,de OR moods:ab,ti,de OR anxiety:ab,ti,de OR anxieties:ab,ti,de OR depressions:ab,ti,de OR dysthymic:ab,ti,de OR dysthymia:ab,ti,de OR dysphoric:ab,ti,de OR affective:ab,ti,de OR depressive:ab,ti,de OR cyclothymic:ab,ti,de OR stress:ab,ti,de | 1,734,105   |

|    |                                                                                                                                                                                                                |         |
|----|----------------------------------------------------------------------------------------------------------------------------------------------------------------------------------------------------------------|---------|
| #3 | microbiota:ab,ti,de OR microbiotas:ab,ti,de OR microbiome:ab,ti,de<br>OR microbiomes:ab,ti,de OR microflora:ab,ti,de OR flora:ab,ti,de OR<br>bacteria:ab,ti,de OR probiotic:ab,ti,de OR microorganism:ab,ti,de | 588,230 |
| #4 | #1 AND #2 AND #3                                                                                                                                                                                               | 466     |

Embase before duplicates removed: 466

Embase after duplicates removed: 132
